# Supplementary material for: Extracellular enzyme production in the coastal upwelling system off Peru during different upwelling scenarios: a mesocosm experiment
Source: Copernicus journal article supplement (doi:10.5194/bg-2022-188), 2022-10-25
Supplement: Supplementary file 1 [file bg-2022-188-supplement.pdf]

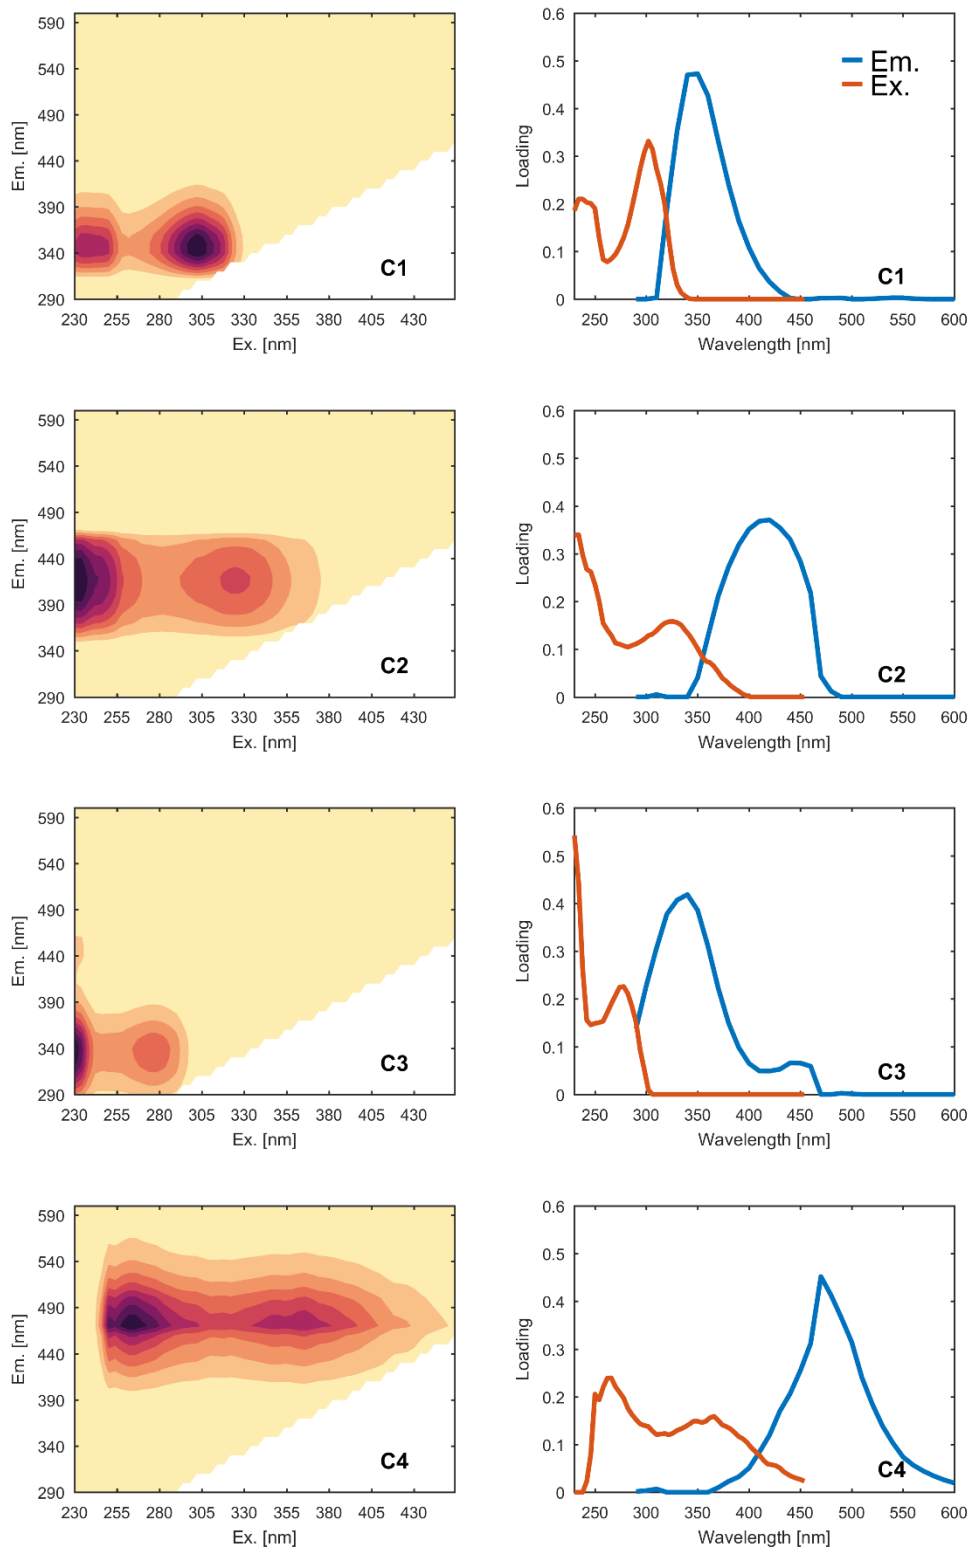

Supplementary Fig S1. FDOM components (C1-C4) derived from the PARAFAC analysis. Left column: EEMs of each component. Right column: corresponding excitation and emission loadings.
